# Supplementary material for: Oxygen vacant Co3O4in situ embedded on carbon spheres: cooperatively tuning electron transfer for boosted peroxymonosulfate activation
Source: Royal Society of Chemistry journal article supplement (doi:10.1039/d1ta03963f), 2021-01-01
Supplement: d1ta03963f1.pdf [file d1ta03963f1.pdf]

## Supporting Information

### **Oxygen vacant $\text{Co}_3\text{O}_4$ *in situ* embedded on carbon spheres: cooperatively tuning electron transfer for boosted peroxymonosulfate activation**

Jian Hu, Binbin Qian, Xiangkang Zeng\*, Yu Qi, Yue Liu, Lian Zhang, Xiwang Zhang\*

Department of Chemical Engineering, Monash University, Clayton, Victoria 3800, Australia

\*Corresponding authors.

E-mail address: xiwang.zhang@monash.edu (X. Zhang), xiangkang.zeng@monash.edu (X. Zeng).

Text S1. The synthesis process of different catalysts in the control experiment.

For the Co@CS (without calcination), CS (without calcination) and CS@600, the synthesis procedures were similar to Co<sub>3</sub>O<sub>4</sub>@CS-600 excluding the following specific processes. Co@CS (without calcination) materials were obtained after the hydrothermal treatment with Co(NO<sub>3</sub>)<sub>2</sub>·6H<sub>2</sub>O as the metal source but without the calcination process. CS (without calcination) was achieved with neither addition of Co(NO<sub>3</sub>)<sub>2</sub>·6H<sub>2</sub>O before the hydrothermal reaction nor calcination treatment for the final step. CS@600 materials were prepared without the addition of cobalt metal source but after the hydrothermal process, the organic materials were calcined in Ar at 600 °C for 2 h. Co<sub>3</sub>O<sub>4</sub>@600 was obtained by calcinating the final materials in the Air rather than Ar.

Text S2. Spectrophotometric method to measure the PMS concentration

Typically, 0.5 M potassium iodide (KI) solution and 0.05 M sodium bicarbonate (NaHCO<sub>3</sub>) solution were prepared firstly. 0.1 mL filtered reaction solution was added into 4.9 mL above-mentioned solution with shaking for 20 min to equilibrate the reaction. Then the sample was analysed at  $\lambda = 352$  nm (UV-2600 UV-vis Spectrophotometer, Shimadzu, Japan).

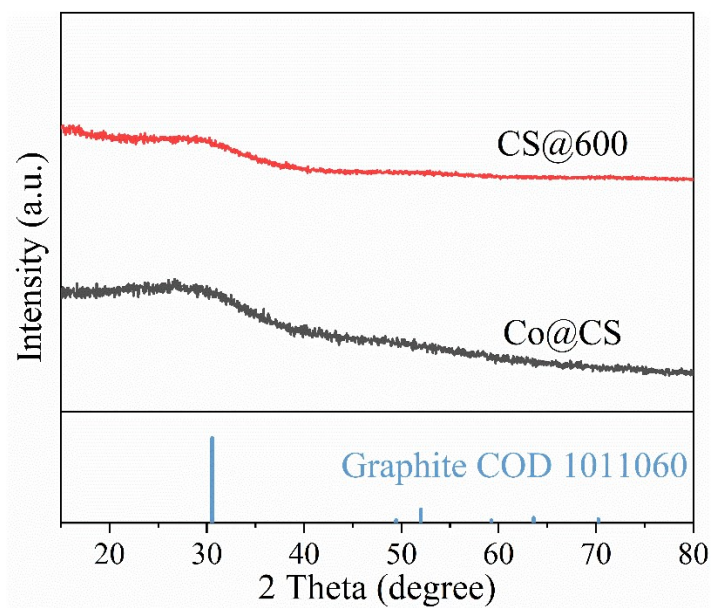

Figure. S1. XRD patterns of CS-600 and Co@CS. Note that all the XRD analysis were conducted with 1000W Co-anode X-ray source with Fe  $K\beta$  filters.

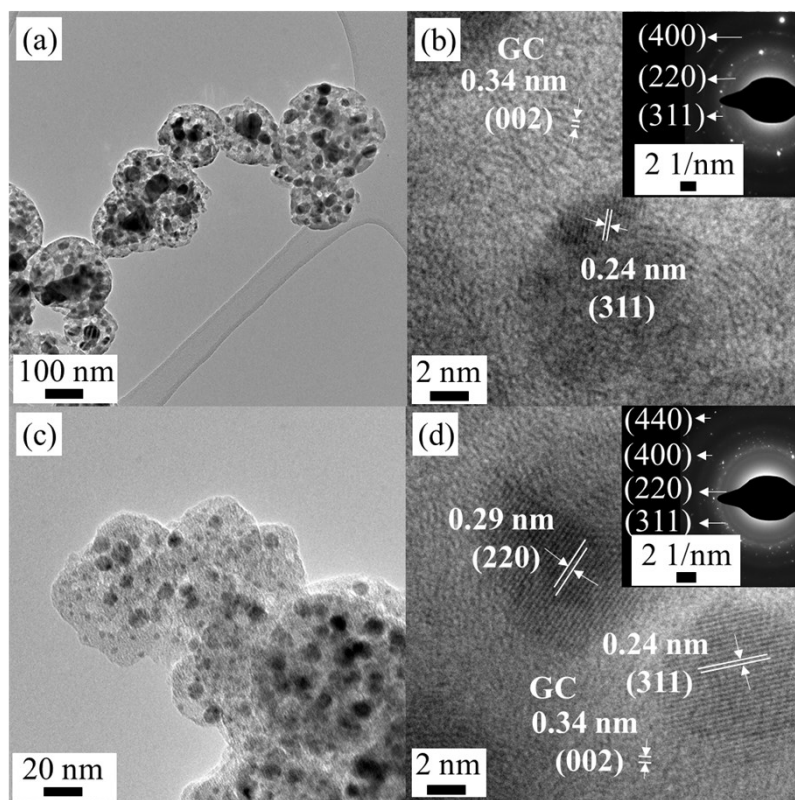

Figure. S2. TEM images of (a)  $\text{Co}_3\text{O}_4@\text{CS-500}$  and (c)  $\text{Co}_3\text{O}_4@\text{CS-700}$ . HRTEM images of (b)  $\text{Co}_3\text{O}_4@\text{CS-500}$  and (d)  $\text{Co}_3\text{O}_4@\text{CS-700}$ .

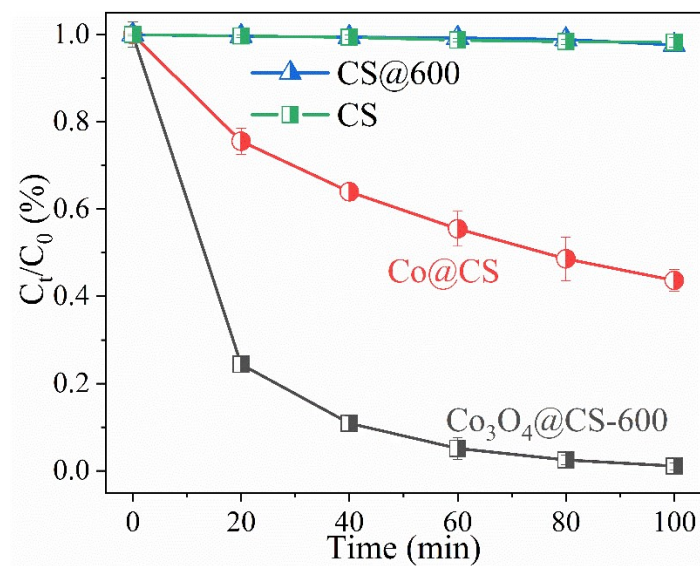

Figure. S3. BPA removal efficiency with Co<sub>3</sub>O<sub>4</sub>@CS-600, Co@CS, CS@600 and CS@600. BPA: 40 mg/L, catalysts: 0.1 g/L, PMS: 0.2 g/L, initial pH = 6.2,  $T = 293$  K.

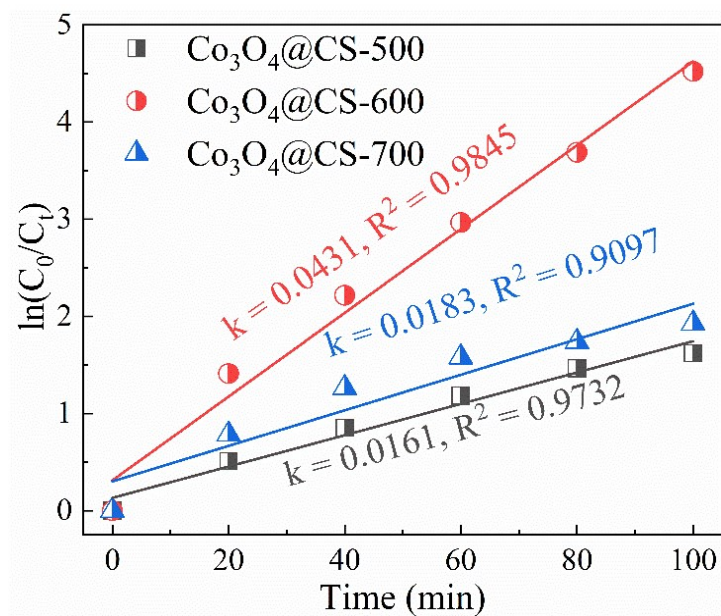

Figure. S4. Pseudo first-order kinetic curves of BPA removal with different catalysts.

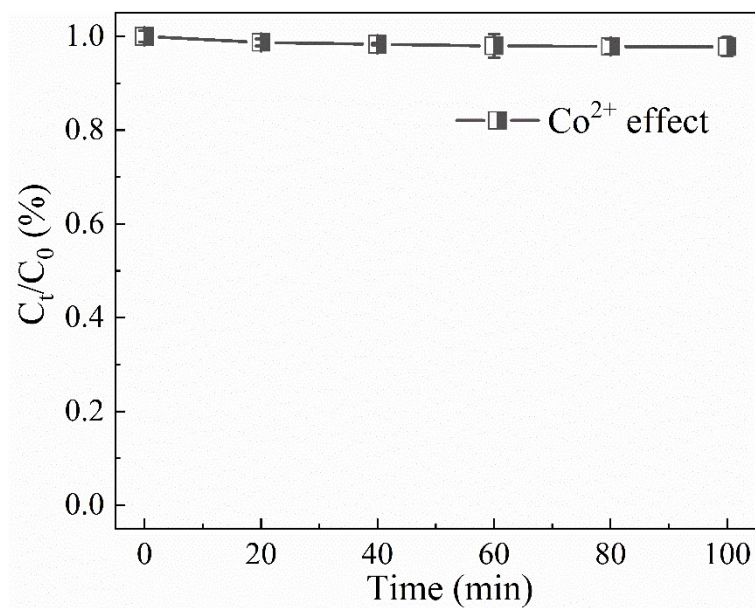

Figure. S5. Effect of the same amount of leached  $Co^{2+}$  (0.29 mg/L  $Co^{2+}$ ) on BPA degradation. Reactions conditions: BPA: 40 mg/L, catalysts: 0.1 g/L, PMS: 0.2 g/L, initial pH = 6.2,  $T = 293$  K.

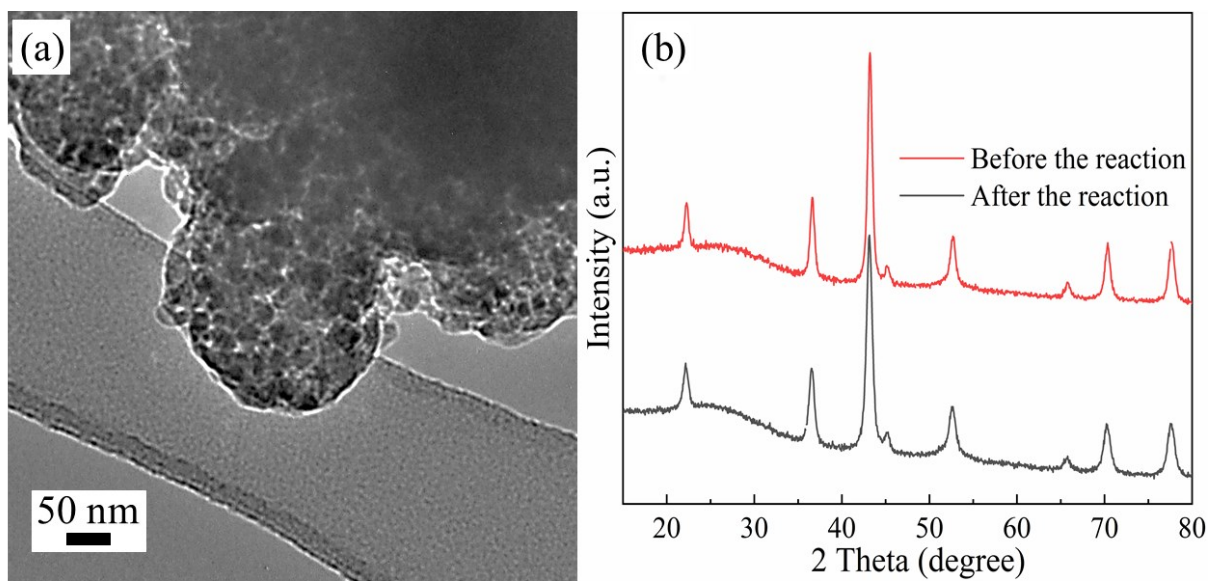

Figure. S6. (a) TEM images of  $\text{Co}_3\text{O}_4@CS-600$  after the reaction. (b) XRD patterns of  $\text{Co}_3\text{O}_4@CS-600$  before and after the reaction.



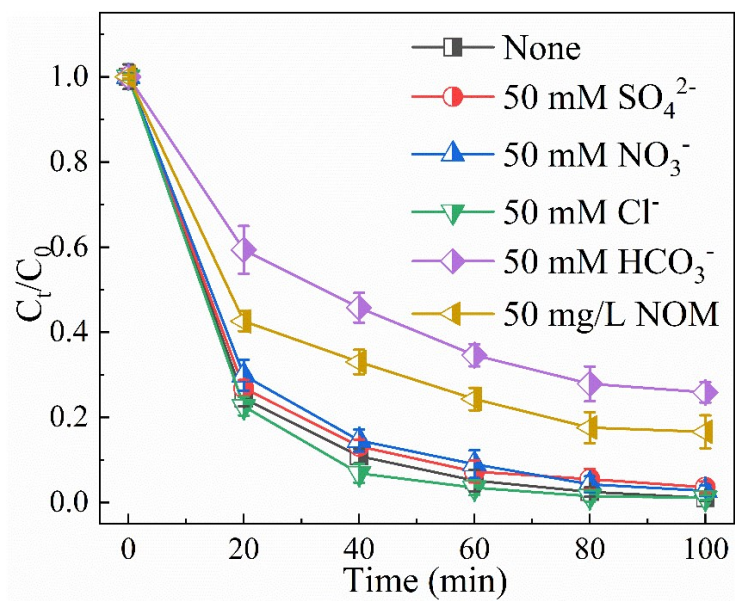

Figure. S7. Effects of inorganic anions  $\text{SO}_4^{2-}$ ,  $\text{NO}_3^-$ ,  $\text{Cl}^-$ ,  $\text{HCO}_3^-$  and NOM on the degradation of BPA. Reactions conditions: BPA: 40 mg/L, catalysts: 0.1 g/L, PMS: 0.2 g/L, initial pH = 6.2,  $T = 293$  K.

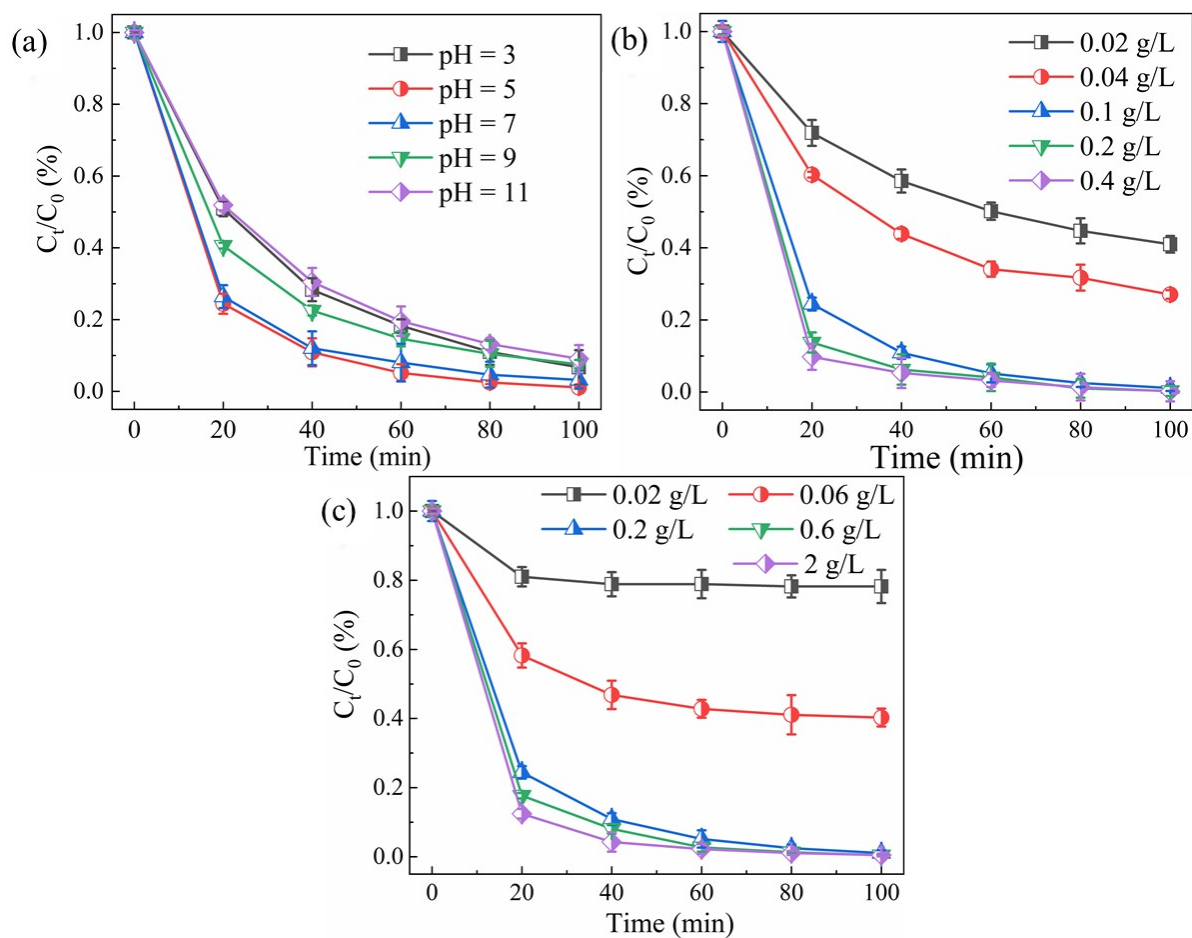

Figure. S8. Effects of (a) initial pH values, (b) catalysts dosage and (c) PMS dosage. Basic reactions conditions: BPA: 40 mg/L, catalysts: 0.1 g/L, PMS: 0.2 g/L, initial pH = 6.2,  $T = 293$  K.

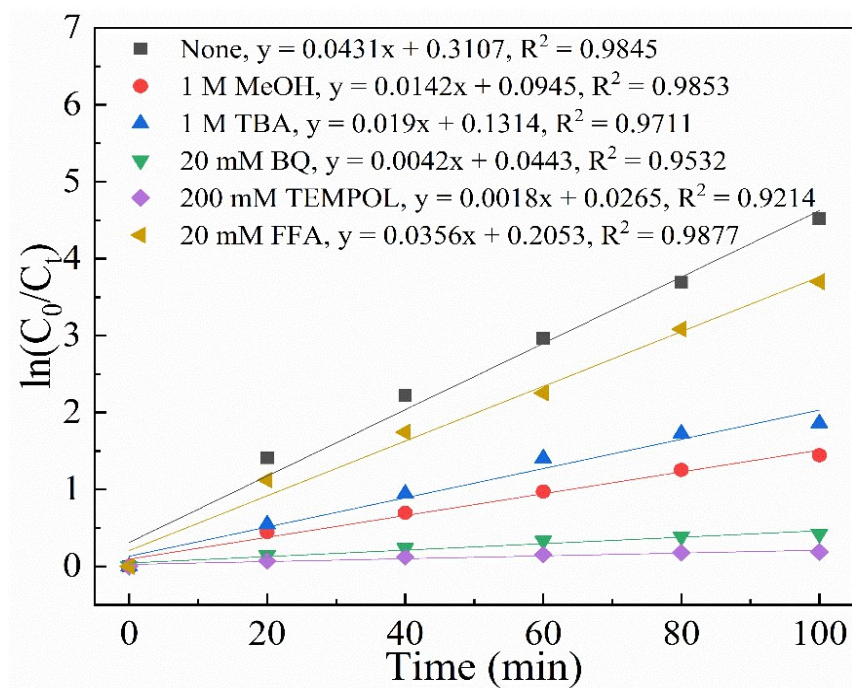

Figure. S9. Pseudo first-order kinetic curves of each quenching test. Reactions conditions:

BPA: 40 mg/L, PMS: 0.2 g/L, initial pH = 6.2,  $T = 293$  K.

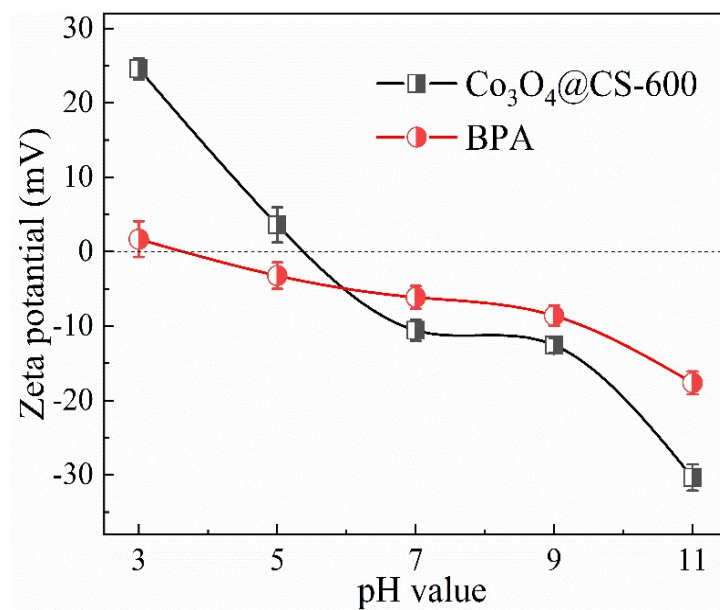

Figure. S10. Zeta potential of Co<sub>3</sub>O<sub>4</sub>@CS-600 and BPA at different pH conditions.

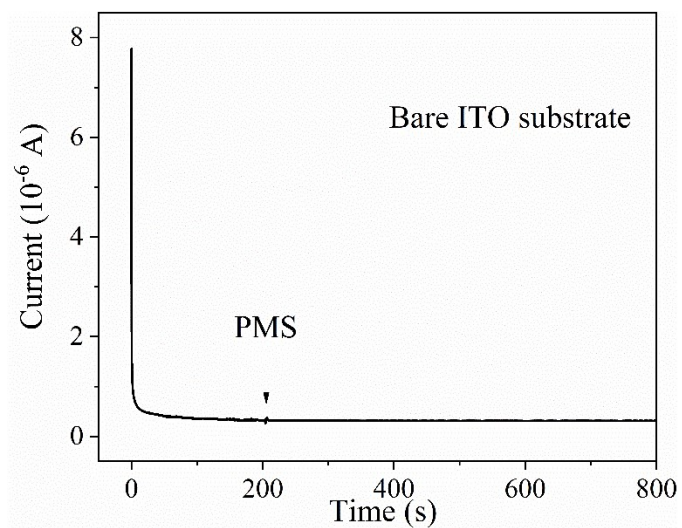

Figure. S11. Current-time (i-t) curves of bare ITO substrate.

Table S1. The concentration of leached cobalt ions with different catalysts

| Sample                                 | Leached Co ions concentration (mg/L) |
|----------------------------------------|--------------------------------------|
| Co@CS                                  | 7.85                                 |
| Co <sub>3</sub> O <sub>4</sub> @CS-500 | 0.58                                 |
| Co <sub>3</sub> O <sub>4</sub> @CS-600 | 0.29                                 |
| Co <sub>3</sub> O <sub>4</sub> @CS-700 | 0.16                                 |

Table S2. Comparison of different catalysts for base activation of persulfate.

| Catalyst                                      | Pollutants (mM)        | Persulfate dosage (mM) | Catalyst dosage (g/L) | pH values | Time used for removal | First-order kinetic constants (min <sup>-1</sup> ) | Main reactive species                                      | References |
|-----------------------------------------------|------------------------|------------------------|-----------------------|-----------|-----------------------|----------------------------------------------------|------------------------------------------------------------|------------|
| Co <sub>3</sub> O <sub>4</sub> @CNT           | norfloxacin, 0.03      | PMS, 0.5               | 0.12                  | 7         | 60 min, 94.8%         | 0.0436                                             | <sup>1</sup> O <sub>2</sub>                                | 1          |
| Co <sub>3</sub> O <sub>4</sub> -rice husk ash | Rhodamine B, 1         | PMS, 1.63 (0.5 g/L)    | 0.02                  | 6         | 60 min, 96.3%         | 0.17                                               | <sup>1</sup> O <sub>2</sub> , O <sub>2</sub> <sup>·-</sup> | 2          |
| Co <sub>3</sub> O <sub>4</sub> @NCs           | sulfamethoxazole , 0.1 | PMS, 0.65 (0.2 g/L)    | 0.01                  | 9.0       | 6.67                  | 0.0062                                             | <sup>1</sup> O <sub>2</sub>                                | 3          |
| Co <sub>3</sub> O <sub>4</sub> @NSC           | paracetamol, 0.07      | PMS, 0.5               | 0.1                   | 5.0       | -                     | 0.162 min <sup>-1</sup>                            | <sup>1</sup> O <sub>2</sub> , O <sub>2</sub> <sup>·-</sup> | 4          |
| rGO-Co <sub>3</sub> O <sub>4</sub>            | tetracycline, 0.01     | PDS, 0.3               | 0.1                   | 6         | 60 min, 96%           | 0.023                                              | ·OH, SO <sub>4</sub> <sup>·-</sup>                         | 5          |
| Co doped Al <sub>2</sub> O <sub>3</sub>       | tartrazine, 0.05       | PMS, 0.32              | 3 mM                  | 3.6       | 240 min, 98%          | -                                                  | -                                                          | 6          |
| Co <sub>3</sub> O <sub>4</sub> @CS-600        | BPA, 0.16 (40 mg/L)    | PMS, 0.65 (0.2 g/L)    | 0.1                   | 6.2       | 100 min, 99.0 %       | 0.0431                                             | O <sub>2</sub> <sup>·-</sup>                               | This work  |

Table S3. Crystal lattice parameters of  $\text{Co}_3\text{O}_4@\text{CS-600}$  before and after the reaction.

| Sample              | a=b=c (Å) | Volume (Å <sup>3</sup> ) |
|---------------------|-----------|--------------------------|
| Before the reaction | 8.09790   | 531.03                   |
| After the reaction  | 8.09790   | 531.03                   |



Table S4. Comparison of catalysts and catalytic performance with our previous work

| Sample                                 | BPA degradation rate                         |                              |                | Ref.         |
|----------------------------------------|----------------------------------------------|------------------------------|----------------|--------------|
|                                        | (min <sup>-1</sup> , 100 min <sup>-1</sup> ) | V <sub>O</sub> concentration | Carbon content |              |
| Co <sub>3</sub> O <sub>4</sub> @CS-500 | 0.0161                                       | 22.3%                        | 85.3%          | This<br>work |
| Co <sub>3</sub> O <sub>4</sub> @CS-600 | 0.0431                                       | 42.7%                        | 84.2%          |              |
| Co <sub>3</sub> O <sub>4</sub> @CS-700 | 0.0183                                       | 27.6%                        | 82.6%          |              |
| 400-1                                  | 0.0116                                       | 24.4%                        | <4%            | 7            |
| 400-2                                  | 0.0232                                       | 32.4%                        | <4%            |              |
| 500-6                                  | 0.0050                                       | 21.2%                        | <4%            |              |

Note:

In our previous study, 400-1 was obtained by calcination Co@CS under 400°C with 1 h in the air. 400-2 was obtained by calcination Co@CS under 400°C with 2 h in the air. 500-6 was obtained by calcination Co@CS under 500°C with 6 h in the air.

References:

1. B. Liu, W. Song, H. Wu, Z. Liu, Y. Teng, Y. Sun, Y. Xu and H. Zheng, *Chemical Engineering Journal*, 2020, 398, 125498.
2. J. Di, R. Jamakanga, Q. Chen, J. Li, X. Gai, Y. Li, R. Yang and Q. Ma, *Science of The Total Environment*, 2021, 784, 147258.
3. J. Ye, J. Dai, C. Li and Y. Yan, *Chemical Engineering Journal*, 2020, 127805.
4. W. Xiang, Q. Ji, C. Xu, Y. Guo, Y. Liu, D. Sun, W. Zhou, Z. Xu, C. Qi and S. Yang, *Appl. Catal., B*, 2021, 285, 119847.
5. V. C. Dang, D. T. Tran, A. T. Phan and N. K. Pham, *Journal of Physics and Chemistry of Solids*, 2021, 153, 110005.
6. M. Ajduković, S. Stojadinović, S. Marinović, A. Milutinović-Nikolić, B. Dojčinović and P. Banković, *Applied Surface Science*, 2020, 503, 144144.
7. J. Hu, X. Zeng, G. Wang, B. Qian, Y. Liu, X. Hu, B. He, L. Zhang and X. Zhang, *Chemical Engineering Journal*, 2020, 400, 125869.
